# Supplementary material for: Detectable HIV-1 in semen in individuals with very low blood viral loads
Source: Springer Nature journal article supplement (doi:10.1186/s12985-020-01300-6), 2020-03-05

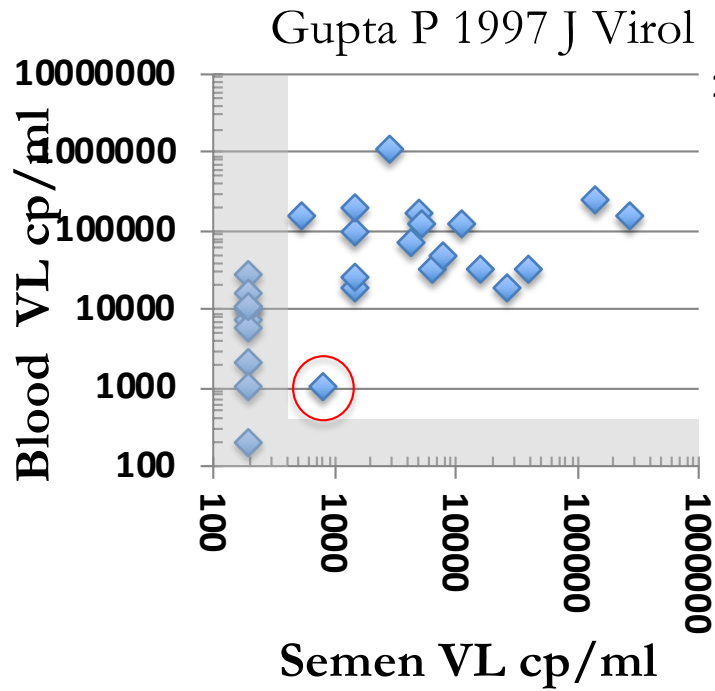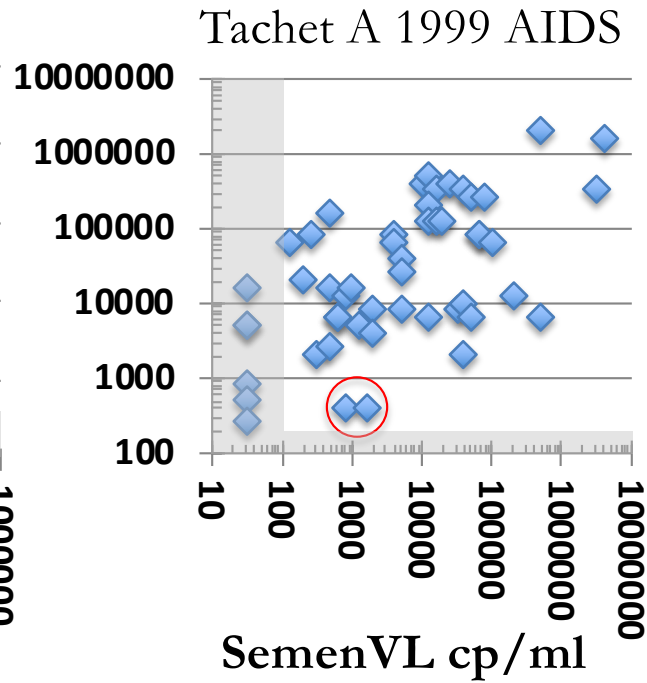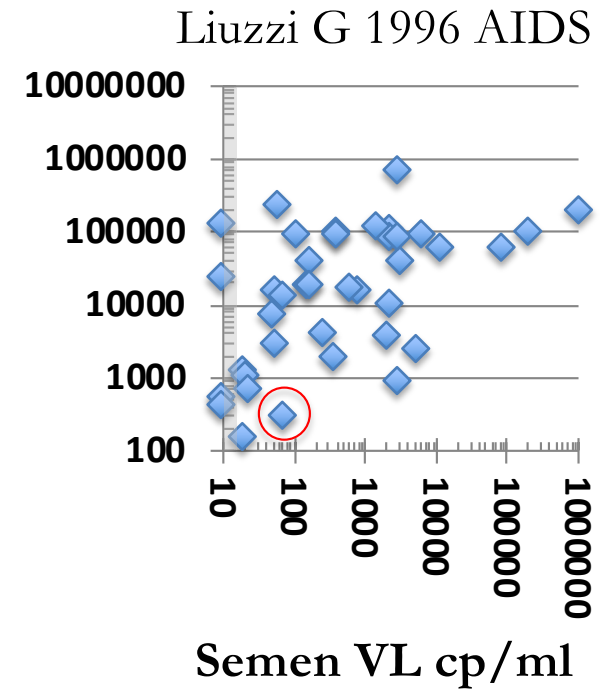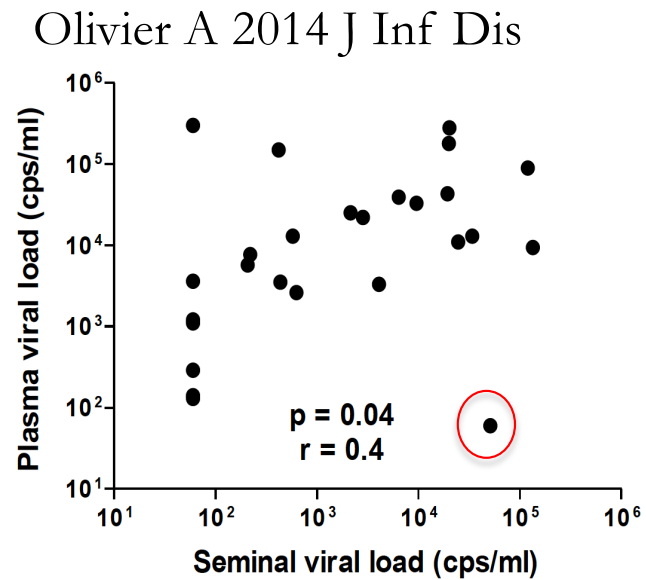

Supplement: MOESM1 [file 17774508]
